# Supplementary material for: The role of the Indian Ocean Dipole in modulating the austral spring ENSO teleconnection to the Southern Hemisphere
Source: Copernicus journal article supplement (doi:10.5194/wcd-5-1505-2024), 2024-12-17
Supplement: Supplementary file 1 [file wcd-5-1505-2024-supplement.pdf]

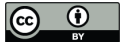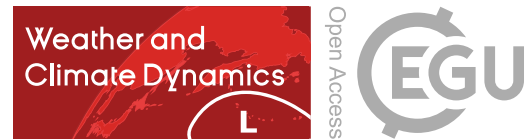

*Supplement of*

## **The role of the Indian Ocean Dipole in modulating the austral spring ENSO teleconnection to the Southern Hemisphere**

**Luciano Gustavo Andrian et al.**

*Correspondence to:* Luciano Gustavo Andrian ([luciano.andrian@cima.fcen.uba.ar](mailto:luciano.andrian@cima.fcen.uba.ar))

The copyright of individual parts of the supplement might differ from the article licence.

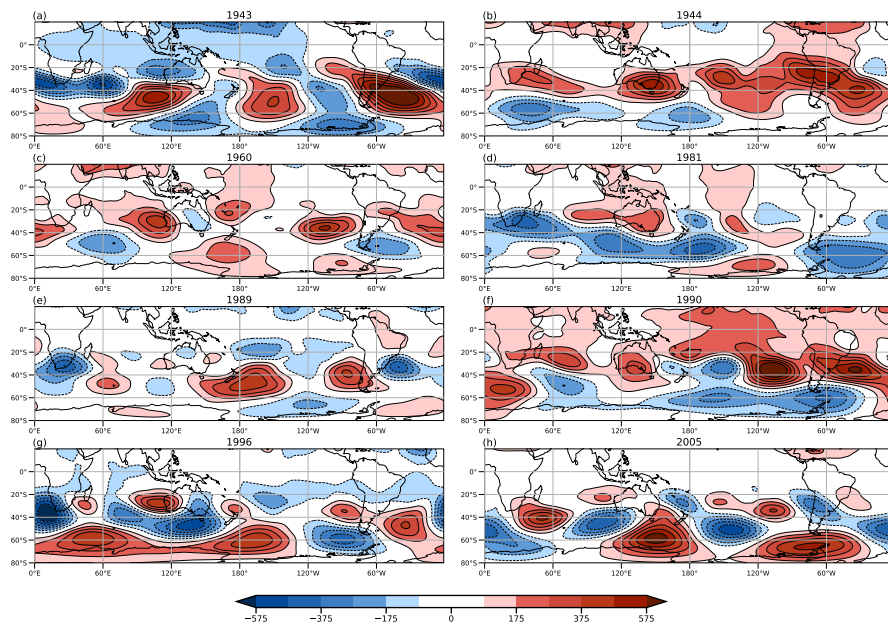

Figure S1: z anomaly fields at 200hPa for each negative IOD events in the period 1940-2020.

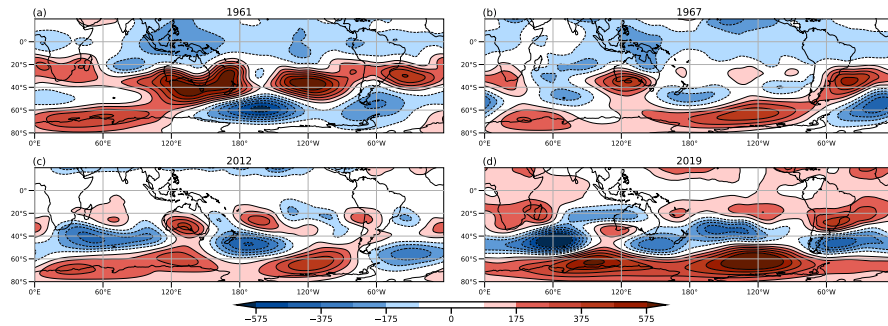

Figure S2:  $z$  anomaly fields at 200hPa for each positive IOD events in the period 1940-2020.

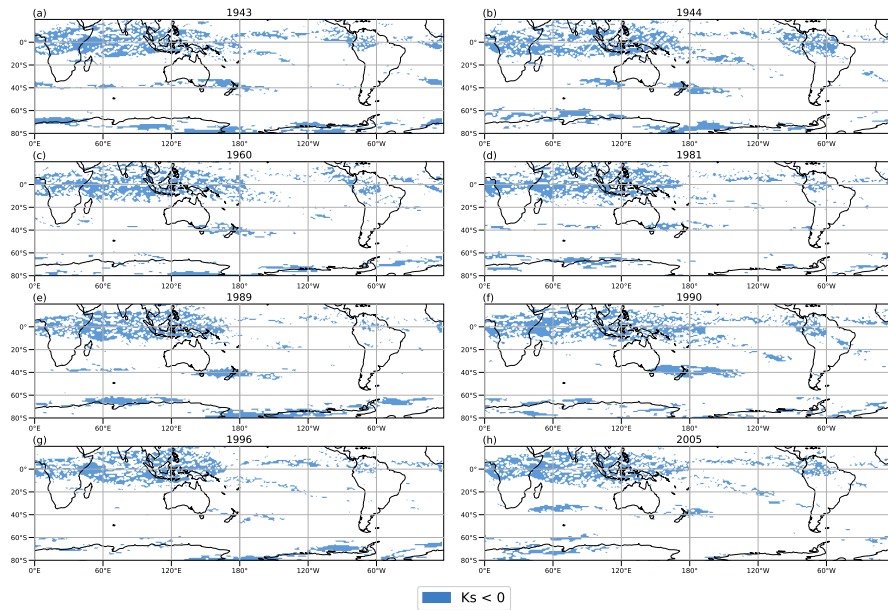

Figure S3: Stationary wave number  $K_s$  fields for each negative IOD event in the period 1940-2020.

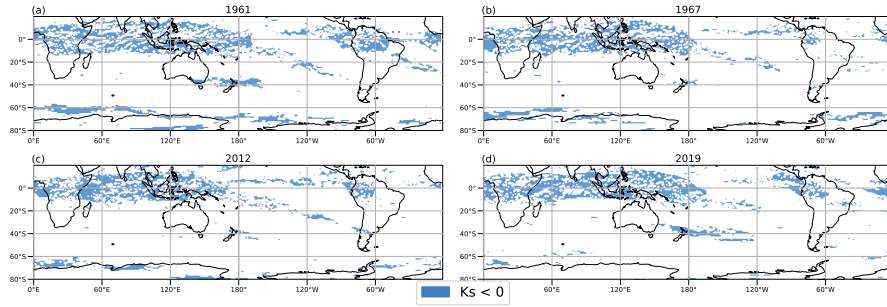

Figure S4: Stationary wave number  $K_s$  fields for each positive IOD event in the period 1940-2020.

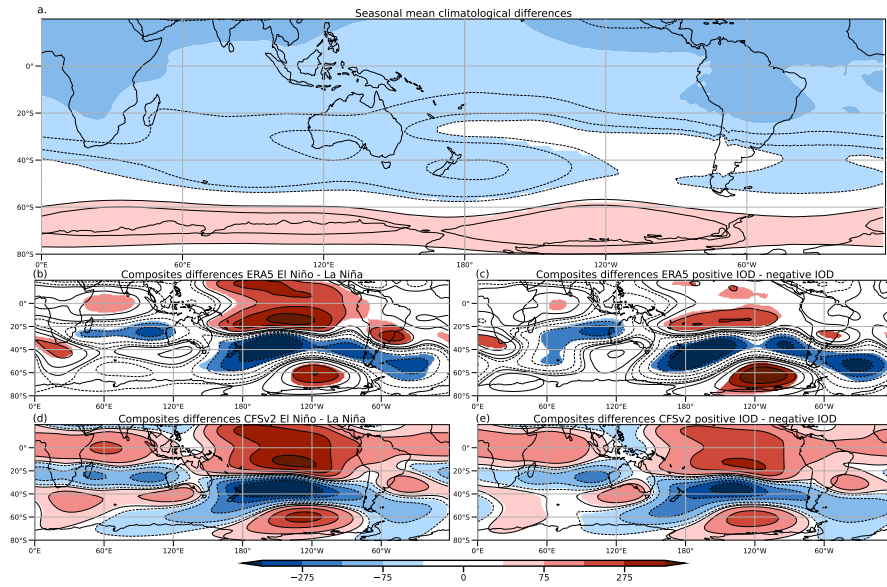

Figure S5: (a) Differences in the mean field of geopotential height (m) at 200hPa between CFSv2 and the ERA5 model in SON for 1982-2020 period. Differences between the mean fields of geopotential height anomalies (m) at 200hPa between the positive and negative phases of the ENSO (b, d) and IOD (c, e) events for ERA5 (b, c) and CFSv2 (d, e).
